# Supplementary material for: Oligodendrocyte Slc48a1 (Hrg1) encodes a functional heme transporter required for myelin integrity
Source: PubMed Central journal article supplement (PMC11662986; doi:10.1002/glia.24641), 2024-11-06
Supplement: GLIA-73-399-s005.pdf [file GLIA-73-399-s005.pdf]

**Table S1**

| REAGENT or RESOURCE                                    | SOURCE                 | IDENTIFIER                      |
|--------------------------------------------------------|------------------------|---------------------------------|
| Antibodies                                             |                        |                                 |
| Rat anti-MBP (aa82-87)                                 | Bio-Rad                | Cat# MCA409S; RRID:AB_325004    |
| Chicken anti-Neun                                      | Merck                  | Cat# ABN91; RRID:AB_11205760    |
| Mouse anti-MOG                                         | Merck                  | Cat# MAB5680; RRID:AB_1587278   |
| Rabbit anti-Neurofilament 200 (NF-H)                   | Merck                  | Cat# N4142; RRID:AB_477272      |
| Mouse anti-Synaptophysin                               | Merck                  | Cat# S5768; RRID:AB_477523      |
| Rabbit Anti-Caspr1                                     | Abcam                  | Cat# ab34151; RRID:AB_869934    |
| Rabbit anti-Hrg1 (Western blotting; 1: 500 dilution)   | Iqbal Hamza, UMD       | Pek et al.                      |
| Rabbit anti-Hrg1 (Immunofluorescence; 1: 100 dilution) | Rosemary O'Connor, UCC | O'Callaghan et al.              |
| Mouse anti-Hrg1 (Immunofluorescence; 1: 100 dilution)  | Rosemary O'Connor, UCC | O'Callaghan et al.              |
| Rabbit anti-HMOX2                                      | CST                    | Cat# 32790S; RRID:AB_2799030    |
| Rabbit anti-FTH1                                       | CST                    | Cat# 3998S; RRID:AB_1903974     |
| Mouse anti-Cytochrome C (Cycs)                         | Abcam                  | Cat# ab110325; RRID:AB_10864775 |
| Rabbit anti-TOMM20                                     | Abcam                  | Cat# ab186735; RRID:AB_2889972  |
| Mouse Anti-Mitochondria                                | Abcam                  | Cat# ab92824; RRID:AB_10562769  |
| Goat anti-SOX10                                        | Biotechne              | Cat# AF2864; RRID:AB_442208     |
| Mouse anti-CNPase (Cnp)                                | Merck                  | Cat# C5922; RRID:AB_476854      |
| Mouse anti MAG, clone 513                              | Merck                  | Cat# MAB1567; RRID:AB_11214010  |
| Mouse anti-heme oxygenase 1 (Hmox1)                    | Abcam                  | Cat# ab13248; RRID:AB_2118663   |
| Mouse anti- $\beta$ -Actin                             | Merck                  | Cat# A1978; RRID:AB_476692      |
| Rabbit anti-myelin Plp                                 | Abcam                  | Cat# ab28486; RRID:AB_776593    |
| Rabbit anti-ASPA                                       | Abcam                  | Cat# ab239522; RRID N/A         |
| Rabbit anti-Iba1                                       | Alpha Laboratories     | Cat # 019-19741; RRID:AB_839504 |
| Goat anti-Olig2                                        | Biotechne              | Cat# AF2418; RRID:AB_2157554    |

|                                                                                          |                          |                                  |
|------------------------------------------------------------------------------------------|--------------------------|----------------------------------|
| Donkey anti-Goat IgG (H+L) Cross-Adsorbed Secondary Antibody, Alexa Fluor 488            | Thermo Fisher Scientific | Cat# A11055; RRID:AB_2534102     |
| Donkey anti Goat IgG (H+L) Secondary Antibody, Alexa Fluor 647, Invitrogen               | Thermo Fisher Scientific | Cat# A21447; RRID:AB_2535864     |
| Donkey anti-Rabbit IgG (H+L) Highly Cross-Adsorbed Secondary Antibody, Alexa Fluor 488   | Thermo Fisher Scientific | Cat# A21206; RRID:AB_2535792     |
| Donkey anti-Rabbit IgG (H+L) Highly Cross-Adsorbed Secondary Antibody, Alexa Fluor 555   | Thermo Fisher Scientific | Cat# A31572; RRID:AB_162543      |
| Donkey anti Rabbit IgG (H+L) Highly Cross Adsorbed Secondary Antibody, Alexa Fluor 647   | Thermo Fisher Scientific | Cat# A31573; RRID:AB_2536183     |
| Donkey anti Rat IgG (H+L) Highly Cross Adsorbed Secondary Antibody, Alexa Fluor 488      | Thermo Fisher Scientific | Cat# A21208; RRID:AB_2535794     |
| Donkey anti-Rat IgG (H+L) Highly Cross-Adsorbed Secondary Antibody, Alexa Fluor Plus 647 | Thermo Fisher Scientific | Cat# A48272; RRID:AB_2893138     |
| Donkey anti-Mouse IgG (H+L) Highly Cross-Adsorbed Secondary Antibody, Alexa Fluor 488    | Thermo Fisher Scientific | Cat A21202; RRID:AB_141607       |
| Donkey anti Mouse IgG (H+L) Secondary Antibody, Alexa Fluor 555, Invitrogen              | Thermo Fisher Scientific | Cat# A31570; RRID:AB_2536180     |
| Goat Anti-Rat IgG (IRDye® 800CW)                                                         | LI-COR Biosciences       | Cat# 925-32219; RRID:AB_2721932  |
| Goat Anti-Mouse IgG (IRDye 800CW)                                                        | LI-COR Biosciences       | Cat# 925-32210; RRID:AB_2687825  |
| Goat Anti-Rabbit IgG (IRDye 800CW)                                                       | LI-COR Biosciences       | Cat# 925-32211; RRID:AB_2651127  |
| Donkey Anti-Chicken IgG (IRDye® 680RD)                                                   | LI-COR Biosciences       | Cat# 925-68075; RRID:AB_2814924  |
| Goat Anti-Rat IgG (IRDye 680RD)                                                          | LI-COR Biosciences       | Cat# 925-68076; RRID:AB_2814913  |
| Goat Anti-Mouse IgG (IRDye 680RD)                                                        | LI-COR Biosciences       | Cat# 925-68070; RRID:AB_2651128  |
| Goat Anti-Rabbit IgG (IRDye 680RD)                                                       | LI-COR Biosciences       | Cat# 925-68071; RRID:AB_2721181  |
| Anti-A2B5 Antibody, clone A2B5-105                                                       | Merck                    | Cat# MAB312; RRID:AB_11213452    |
| Anti-Mouse IgM MicroBeads                                                                | Miltenyi Biotec          | Cat# 130-047-301; RRID:AB_244358 |

|                                               |                                 |                       |
|-----------------------------------------------|---------------------------------|-----------------------|
| Goat anti-rat IgG, abberior STAR 580          | abberior<br>Instruments<br>GmbH | Cat# ST580-1007-500UG |
| Goat anti-rabbit IgG, abberior STARRED        | abberior<br>Instruments<br>GmbH | Cat# STRED-1002-500UG |
| Bacterial and virus strains                   |                                 |                       |
| N/A                                           |                                 |                       |
| Biological samples                            |                                 |                       |
| Primary rat oligodendrocyte cultures          | This paper                      |                       |
| Primary mouse mixed glial cultures            | This paper                      |                       |
| Chemicals, peptides, and recombinant proteins |                                 |                       |
| Hibernate-A                                   | Thermo Fisher<br>Scientific     | Cat# A12475-01        |
| HBSS                                          | Thermo Fisher<br>Scientific     | Cat# 14170-112        |
| Papain                                        | Worthington<br>Labs             | Cat# L5003126         |
| DNase Type I                                  | Merck                           | Cat# D5025            |
| Percoll Plus                                  | Cytiva                          | Cat# 17544501         |
| Red Blood Cell Lysis Buffer                   | Merck                           | Cat# R7757            |
| B27 50X Supplement                            | Thermo Fisher<br>Scientific     | Cat# 17504-044        |
| Apo-transferrin                               | Merck                           | Cat# T1147            |
| DMEM/F12                                      | Thermo Fisher<br>Scientific     | Cat# 11039-021        |
| PDGF (Recombinant Human PDGF-AA)              | Peprotech                       | Cat# 100-13A-100      |
| FGF (Recombinant Human FGF-basic (154 a.a.))  | Peprotech                       | Cat# 100-18B-500      |
| HB-EGF (Recombinant Human HB-EGF)             | Peprotech                       | Cat# 100-47           |
| Insulin Solution                              | Merck                           | Cat# I9278            |
| Ferriprotoporphyrin IX chloride (Hemin)       | Merck                           | Cat# H9039-1G         |

|                                                                         |                          |                          |
|-------------------------------------------------------------------------|--------------------------|--------------------------|
| Zn(II) Mesoporphyrin IX (ZnMP)                                          | Santa Cruz Biotechnology | Cat# sc-396862           |
| Tin protoporphyrin IX dichloride (SnPP)                                 | Tocris                   | Cat# 0747/10             |
| Deferoxamine (DFO)                                                      | Merck                    | Cat# D9533-1G            |
| Hoechst 33342 solution                                                  | Thermo Fisher Scientific | Cat# H3570               |
| Tri Reagent                                                             | Thermo Fisher Scientific | Cat# AM9738              |
| Direct-zol RNA MicroPrep                                                | Cambridge Bioscience     | Cat# R2062               |
| Critical commercial assays                                              |                          |                          |
| Live/dead™ Viability/Cytotoxicity Kit, for mammalian cells              | Thermo Fisher Scientific | Cat# L3224               |
| MTT Assay Kit (Cell Proliferation) (ab211091)                           | Abcam                    | Cat# ab211091            |
| Amplex™ Red Cholesterol Assay Kit                                       | Thermo Fisher Scientific | Cat# A12216              |
| Pierce™ Silver Stain Kit                                                | Thermo Fisher Scientific | Cat# 24612               |
| Qubit Protein Assay Kit                                                 | Thermo Fisher Scientific | Cat# Q33212              |
| Deposited data                                                          |                          |                          |
| N/A                                                                     |                          |                          |
| Experimental models: Cell lines                                         |                          |                          |
| N/A                                                                     |                          |                          |
| Experimental models: Organisms/strains                                  |                          |                          |
| Rat: Wister/Han                                                         | Charles River UK         | N/A                      |
| Mice: C57                                                               | Charles River UK         | N/A                      |
| Slc48a1 -/- 2 base pair deletion in background strain of SVJ129/C57BL6J | Iqbal Hamza, UMD         | Pek et al. <sup>19</sup> |
| Oligonucleotides                                                        |                          |                          |

|                                                                                                                   |                             |                                                                                                       |
|-------------------------------------------------------------------------------------------------------------------|-----------------------------|-------------------------------------------------------------------------------------------------------|
| <p><math>\beta</math>-actin</p> <p>forward 5' AGATGACCCAGATCATGTTTGAGA 3', reverse 5' ACCAGAGGCATACAGGGACA 3'</p> | This paper                  | N/A                                                                                                   |
| <p>Slc48a1 (hrg1)</p> <p>forward 5' TTCGTCTGGACGGTGGTCTA 3'</p> <p>reverse 5' GTGAGTCACCAAGACCCACA 3'</p>         | This paper                  | N/A                                                                                                   |
| <p>Mfsd7b</p> <p>forward 5' GTTCTTCGAGACAGCCCCC 3'</p> <p>reverse 5' AGAACAAAGGGGACGTTCCCTG 3'</p>                | This paper                  | N/A                                                                                                   |
| <p>Tfrc</p> <p>forward 5' CCGTTGTTGAGGCAGACCTT 3', reverse 5' CCAGATGACTGAGATGGCGG 3'</p>                         | This paper                  | N/A                                                                                                   |
| <p>Hmox1</p> <p>forward 5' TTAAGCTGGTGATGGCCTCC 3', reverse 5' GTGGGGCATAGACTGGGTTC 3'</p>                        | This paper                  | N/A                                                                                                   |
| <p>Bach1</p> <p>forward 5' AGCTCGACTGCATCCAGAAC 3', reverse 5' GTTCTGCTTTGTCTCCCCGA 3'</p>                        | This paper                  | N/A                                                                                                   |
| <p>MBP</p> <p>forward 5' GCCTGTCCCTCAGCAGATTT 3', reverse 5' GTCGTAGGCCCCCTTGAATC 3'</p>                          | This paper                  | N/A                                                                                                   |
| <p>PLP</p> <p>forward 5' GGCGACTACAAGACCACCAT 3', reverse 5' AATGACACACCCGCTCCAAA 3'</p>                          | This paper                  | N/A                                                                                                   |
| <p>MAG</p> <p>forward 5' GGCGCTTCTCACTCTCATACT 3', reverse 5' CGGGAGACAACCCTCATGTC 3'</p>                         | This paper                  | N/A                                                                                                   |
| Recombinant DNA                                                                                                   |                             |                                                                                                       |
| N/A                                                                                                               |                             |                                                                                                       |
| Software and algorithms                                                                                           |                             |                                                                                                       |
| MyelTracer v1.3.1                                                                                                 | Kaiser et al. <sup>69</sup> | <a href="https://github.com/HarrisonAllen/MyelTracer">https://github.com/HarrisonAllen/MyelTracer</a> |

|                                       |                                         |                                                                                                                                                                             |
|---------------------------------------|-----------------------------------------|-----------------------------------------------------------------------------------------------------------------------------------------------------------------------------|
| GraphPad Prism version 9.0.0 for Mac  | GraphPad Software/<br>Dotmatics,<br>USA | <a href="https://www.graphpad.com/features">https://www.graphpad.com/features</a>                                                                                           |
| OMERO.web 5.22.1                      | University of<br>Dundee, UK             | <a href="https://www.openmicroscopy.org/omero/">https://www.openmicroscopy.org/omero/</a>                                                                                   |
| Other                                 |                                         |                                                                                                                                                                             |
| Operetta CLS                          | Perkin Elmer                            | <a href="https://www.perkinelmer.com/category/operetta-cls-high-content-analysis-system">https://www.perkinelmer.com/category/operetta-cls-high-content-analysis-system</a> |
| Leica Bond RX                         | Leica<br>Microsystems                   | <a href="https://www.leicabiosystems.com/ihc-ish/ihc-ish-instruments/bond-rx/">https://www.leicabiosystems.com/ihc-ish/ihc-ish-instruments/bond-rx/</a>                     |
| RNAscope™ 2.5 LS Probe- Mm-Slc48a1-C2 | Biotechne                               | Cat# 585048-C2                                                                                                                                                              |
| RNAscope™ 2.5 LS Probe- Mm-Syt1       | Biotechne                               | Cat# 491838                                                                                                                                                                 |
| RNAscope™ 2.5 LS Probe- Mm-Ermn-C4    | Biotechne                               | Cat# 527378-C4                                                                                                                                                              |
| RNAscope™ 2.5 LS Probe- Mm-Pdgfra     | Biotechne                               | Cat# 480668                                                                                                                                                                 |
| 70 micron strainer                    | Greiner                                 | Cat# 542070                                                                                                                                                                 |
| LS MACS Columns                       | Miltenyi Biotec                         | Cat# 130-042-401                                                                                                                                                            |
